# Supplementary material for: A Palladium Catalyst Supported on Boron-Doped Porous Carbon for Efficient Dehydrogenation of Formic Acid
Source: MDPI journal article supplement (doi:10.3390/nano14060549), 2024-03-20
Supplement: s1 [file s1]

---

# Palladium Catalyst Supported on Boron-Doped Porous Carbon for Efficient Dehydrogenation of Formic Acid

Hui Liu<sup>1</sup>, Mengyuan Huang<sup>1</sup>, Wenling Tao<sup>1</sup>, Liangliang Han<sup>1</sup>, Jinqiang Zhang<sup>3</sup> and Qingshan Zhao<sup>2,\*</sup>

<sup>1</sup> College of Chemistry and Chemical Engineering, Yantai University, Yantai 264005, China

<sup>2</sup> State Key Laboratory of Heavy Oil Processing, College of Chemistry and Chemical Engineering, China University of Petroleum (East China), Qingdao 266580, China

<sup>3</sup> School of Chemical Engineering, The University of Adelaide, North Terrace, Adelaide, SA 5005, Australia

\* Correspondence: qszhao@upc.edu.cn

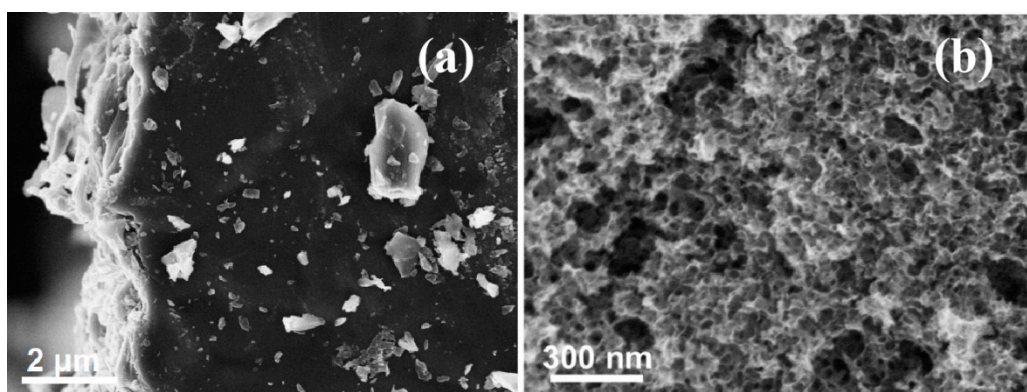

**Figure S1.** SEM images of petroleum asphalt (a) and PC (b).

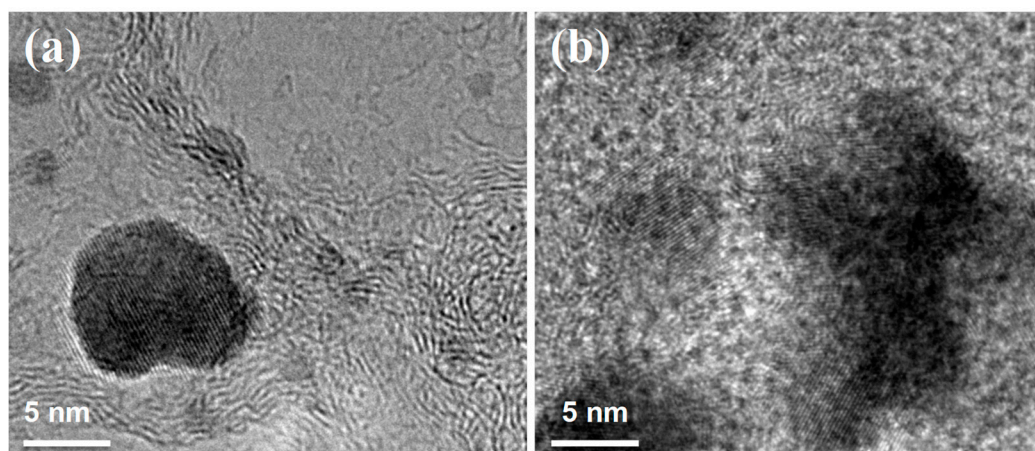

**Figure S2.** HRTEM images of (a) Pd/BPC and (b) Pd/PC.

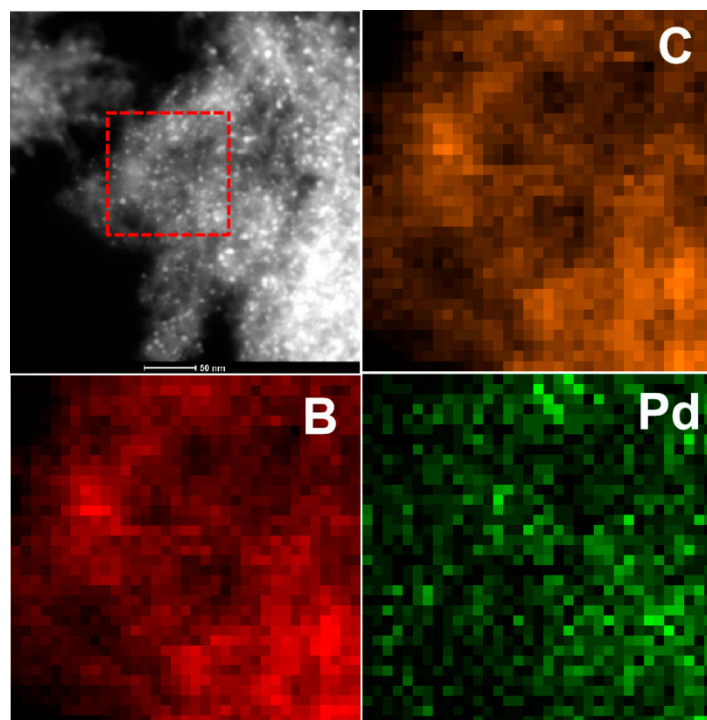

**Figure S3.** TEM image of Pd/BPC and corresponding EDS mapping for the C, B, and Pd elements.

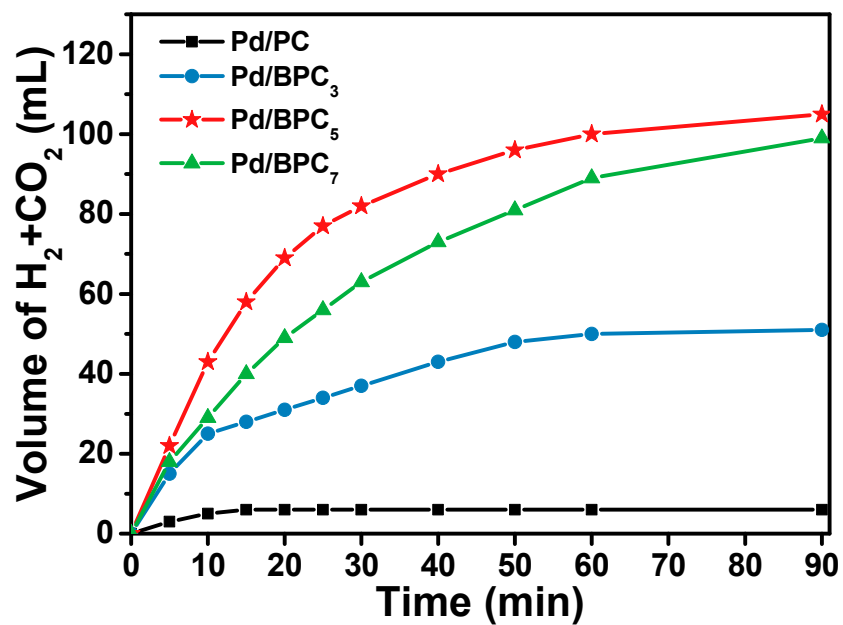

**Figure S4.** The catalytic performance of Pd/BPC<sub>r</sub> (r=3, 5, 7) catalysts for dehydrogenation of formic acid.

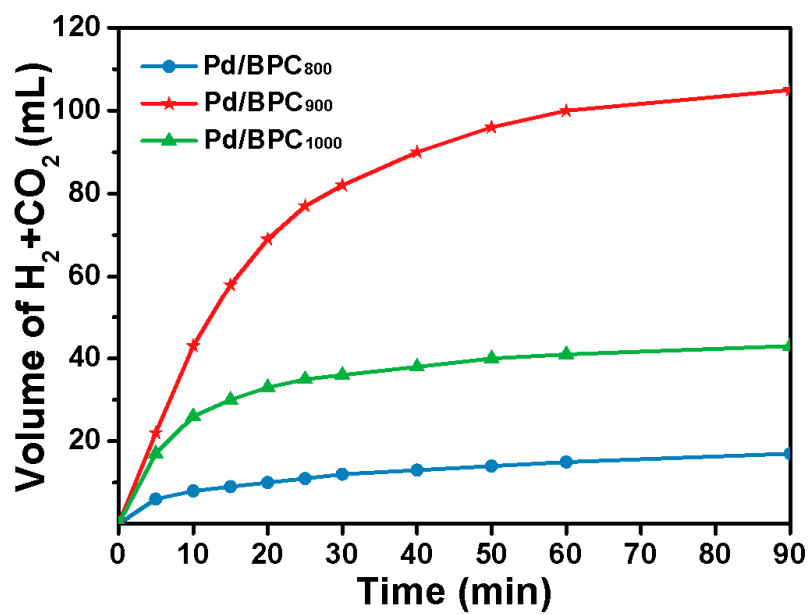

**Figure S5.** The catalytic performance of Pd/BPC<sub>T</sub> (T=800, 900, 1000 °C) for dehydrogenation of formic acid.

---

**Table S1.** The catalytic performance of Pd/BPC<sub>t</sub> (t=0, 20, 40, 60, 80 °C) for dehydrogenation of formic acid.

| Entry | Catalyst | Reduction temperature (°C) | V <sub>gas</sub> (mL) |
|-------|----------|----------------------------|-----------------------|
| 1     | Pd/BPC   | 0                          | 8                     |
| 2     | Pd/BPC   | 20                         | 18                    |
| 3     | Pd/BPC   | 40                         | 36                    |
| 4     | Pd/BPC   | 60                         | 105                   |
| 5     | Pd/BPC   | 80                         | 73                    |

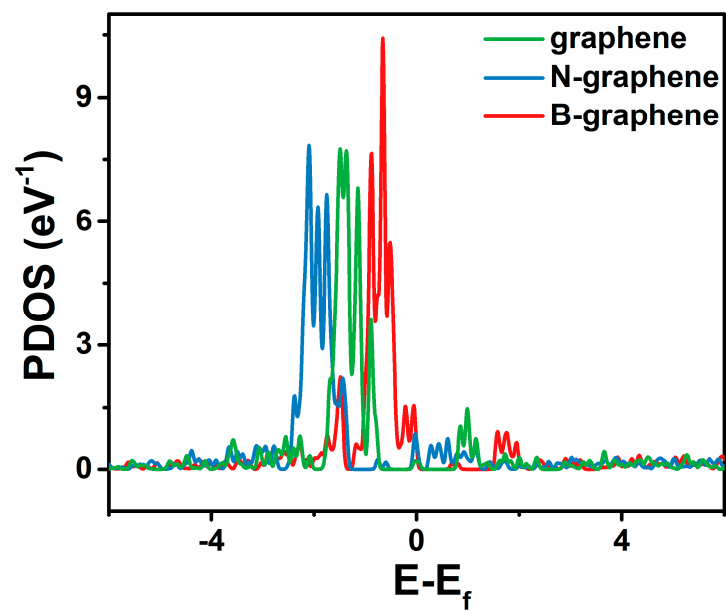

**Figure S6.** The partial DOS of (a) graphene, (b) N-graphene, and (c) B-graphene.
